# Supplementary material
Source: PubMed Central journal article supplement (PMC6384117)
Supplement: AEM.02634-18-s0001.pdf [file AEM.02634-18-s0001.pdf]

## Supplementary Information

1  
2  
3  
4  
5  
6  
7  
8  
9  
10  
11  
12  
13  
14  
15  
16  
17  
18  
19

Towards quantitative microbiome community profiling using internal standards

Yajuan Lin<sup>\*</sup>, Scott Gifford, Hugh Ducklow, Oscar Schofield,  
and Nicolas Cassar<sup>\*</sup>

<sup>\*</sup> Corresponding authors. Email: yajuan.lin@duke.edu (Y.L.) and Nicolas.Cassar@duke.edu  
(N.C.)

**This PDF file includes:**

Material and Methods

Figures S1 and S2

Tables S1, S2 and S3

References

**Other supplementary material includes:**

Tables S4 and S5 (Excel format)

## 20 **Materials and Methods**

### 21 *Site description and environmental sampling*

22           The Palmer Antarctica Long Term Ecosystem Research (PAL) program was initiated  
23 in 1991 to study how annual sea ice variability structures the ecology of the West Antarctic  
24 Peninsula (WAP). A major component of PAL is an annual ship-survey conducted each  
25 austral summer in the month of January. The cruise conducts a series of cross shelf transects  
26 that span a north-south gradient. Discrete water samples were collected by Niskin bottles  
27 attached to a profiling Conductivity-Temperature-Depth (CTD) rosette system. All core  
28 datasets collected by the program are freely available through the Palmer LTER data system  
29 (<http://pal.lternet.edu/data>).

30           Each station was sampled by a rosette equipped with a SeaBird Conductivity-  
31 Temperature-Depth (CTD) system and collecting discrete water samples with Niskin bottles.  
32 Seawater collected at different depths was filtered (1-2 L) onto 25 mm GF/F filters, wrapped  
33 in foil, and frozen at -80°C for fluorometric phytoplankton chlorophyll-*a* (chl-*a*) analysis (mg  
34 chl-*a* m<sup>-3</sup>) or flash frozen in liquid nitrogen and stored at -80°C for HPLC  
35 pigment/phytoplankton composition analysis (mg pigment m<sup>-3</sup>). Filters were extracted in  
36 90% HPLC grade acetone for 24 hours after being macerated with either Teflon pestle and  
37 being ultrasonicated. Procedures and gradients for the HPLC procedures are described in (1).  
38 The taxonomic composition of the phytoplankton assemblages was derived quantitatively  
39 from a High Performance Liquid Chromatography (HPLC) analysis of pigment data using the  
40 program CHEMTAX (V195) with initial pigment ratios derived from WAP phytoplankton by  
41 (1). Starting from the initial pigment ratio matrix and the observed pigment concentration data  
42 set, CHEMTAX quantitatively estimates the phytoplankton abundances (in chl-*a*

43 concentrations) using factor analysis and a “steepest descent” algorithm to optimize the  
44 pigment ratios (2).

45 Phytoplankton carbon-fixation rates were measured by the uptake of radioactive  
46 sodium bicarbonate. In borosilicate flasks, 200 ml aliquots of the sea-water, were inoculated  
47 with nominally 1  $\mu\text{Ci}$  of  $\text{NaH}^{14}\text{CO}_3$  per bottle. The borosilicate bottles were incubated for 24  
48 hours with bottles screened to *in situ* light levels and incubated in an outdoor deck incubator.  
49 After incubation, samples were filtered onto GF/F filters, washed with 10% HCl, dried and  
50 counted in a scintillation counter.

51 Bacterial productivity rates were derived from rates of  $^3\text{H}$ -leucine incorporation  
52 measured. The leucine assays followed a procedure modified from the protocol originally  
53 proposed by (3). Briefly, triplicate 1.5 ml samples were incubated for  $\sim 3$  h with  $^3\text{H}$ -leucine  
54 (MP Biomedical, Santa Ana, CA;  $>100$  Ci/mmol, 20-25 nM final concentration) in 2.0 ml  
55 microcentrifuge tubes (Axygen SCT-200, Union City, CA). Incubations were maintained  
56 within  $0.5^\circ\text{C}$  of the *in situ* temperature in refrigerated circulator baths and terminated by the  
57 addition of 0.1 ml of 100% trichloroacetic acid (TCA). Samples were concentrated by  
58 centrifugation, rinsed with 5% TCA and 70% ethanol and air-dried overnight prior to  
59 radioassay by liquid scintillation counting in Ultima Gold cocktail (Perkin-Elmer, Waltham,  
60 MA). Blank values of TCA-killed samples were subtracted from the average of the triplicates  
61 for each discrete depth sample.

62 For DNA and RNA, 4 L of surface seawater from the ship’s flow-through underway  
63 system was gently vacuum-filtered onto a 47 mm  $0.45\ \mu\text{m}$  pore size Supor filter for years  
64 2012 and 2013, or 47 mm  $0.2\ \mu\text{m}$  Supor filters for year 2015. For some coastal high biomass  
65 stations, filtration was stopped when the filter was clogged ( $< 4$  L) and the total filtrate  
66 volume was recorded. 1 ml of RNA later was added to each filter, and the filter was stored in -

67 80C freezer immediately until further analysis. Surface seawater for flow cytometry were  
68 collected from the Niskin bottles and analyzed on board as described in (4)(5).

69 *Amplicon library construction*

70 16S rRNA gene were amplified by PCR using V4 primer set 515F (5' –  
71 GTGYCAGCMGCCGCGGTAA – 3') (6) and 805R (5' – GACTACNVGGGTATCTAAT –  
72 3') modified from (7) and (8). To decrease the degeneracy of the reverse primer the 13<sup>th</sup> base  
73 pair is 'A' (7, 9) not 'W' as in the 806R V4 primer (8). With this single base difference, the  
74 total degeneracy of the reverse primer decreases from 24 to 12, while it still yields good *in*  
75 *silico* primer coverage using SILVA TestProbe (10) with zero mismatch hits as below:

76 Bacteria 91.8%, including Bacteroidetes 93.3%, Cyanobacteria 91.0% (mostly low hits on  
77 chloroplast 16S rRNA gene), alphaproteobacteria 95.2%, betaproteobacteria 94.9%,  
78 deltaproteobacteria 93.5%, and gammaproteobacteria 94.5%.

79 Archaea 91.1%, including Crenarchaeota 90.9%, and Euryarchaeota 92.8%.

80 18S rRNA genes were amplified by PCR using V4 primer set EukF (5' –  
81 CCAGCASCYGC GGTAATTCC – 3') (11) and EukR (5' – ACTTTCGTTCTTGAT – 3')  
82 modified from (11) as described in (12). The zero mismatch using SILVA TestProbe is as  
83 below,

84 Original (11) reverse primer: Cryptophyceae 94.9%, Haptophyta 2.4%, Alveolata 80.8%  
85 (including Dinoflagellata 90.2%), Stramenopiles 92.6% (including Diatomea 93.7%).

86 Modified reverse primer: Cryptophyceae 94.9%, Haptophyta 97.1%, Alveolata 81.1%  
87 (including Dinoflagellata 90.7%), Stramenopiles 93.0% (including Diatomea 94%).

88

89

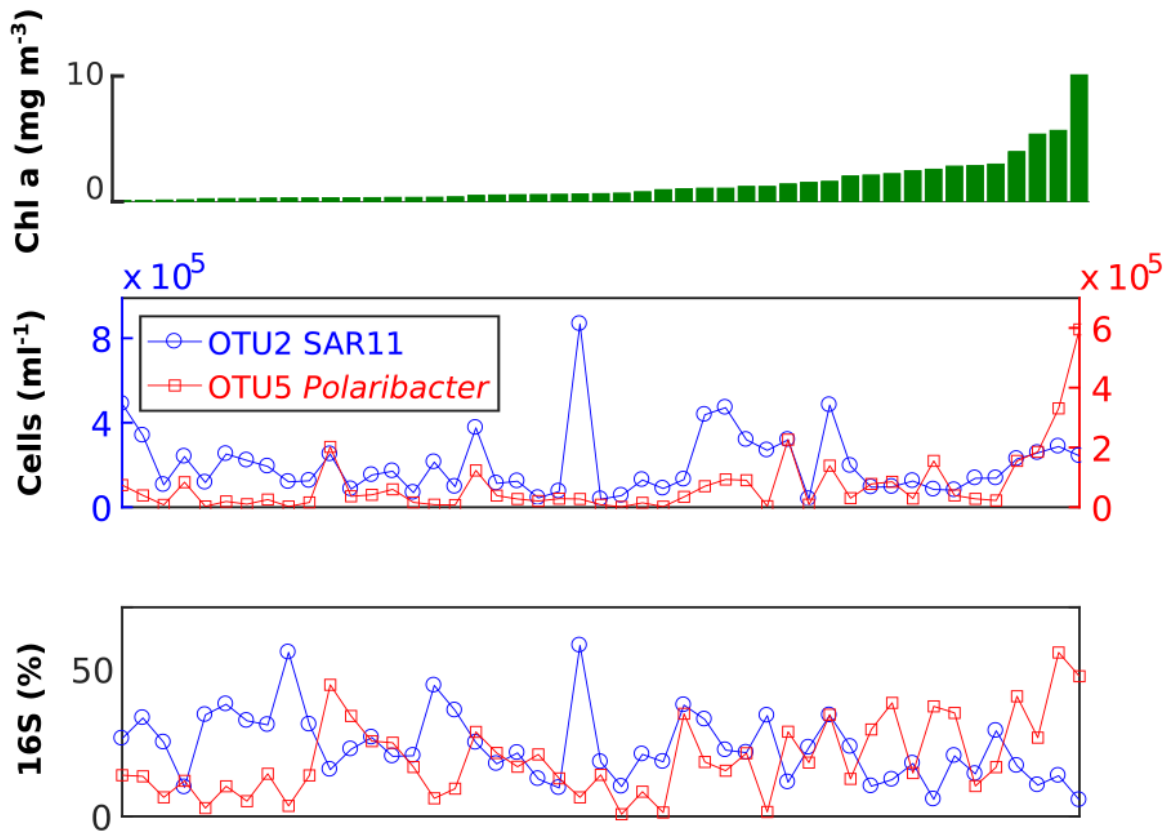

90

91 **Figure S1.** QMP and RMP for two representative OTUs ranked by ascending Chl a  
92 concentrations. QMP (top) in cells  $\text{ml}^{-1}$  and RMP (bottom) in % for OTU2 (SAR11) in blue  
93 circles and OTU5 (*Polaribacter*) in red squares.

94

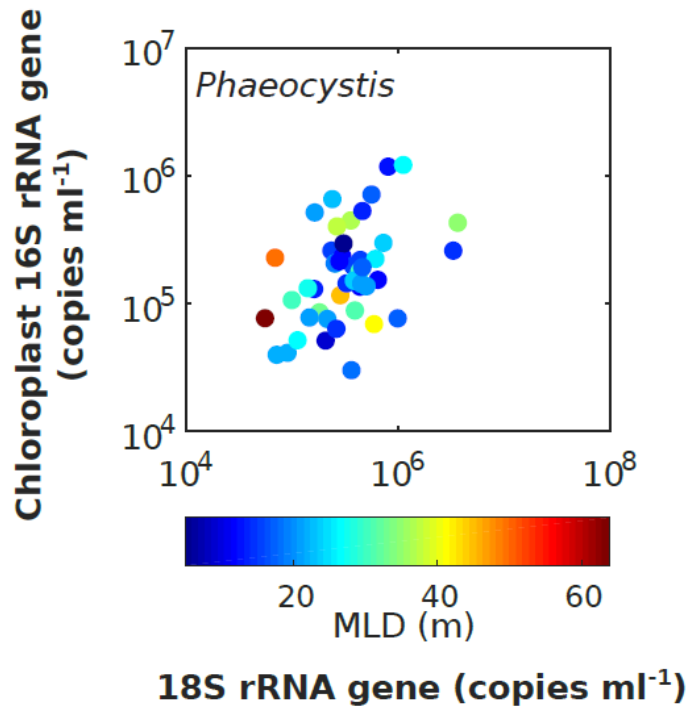

95

96 **Figure S2.** *Phaeocystis* abundances chloroplast 16S vs. genomic 18S rRNA gene. Data points

97 are color-coded by mixed layer depth ( $\Delta\sigma_\theta = 0.125 \text{ kg m}^{-3}$ ).

98

99 **Table S1.** The CV (%) of taxa abundances estimates from duplicate samples Coastal 2A and  
100 Costal 2B in Figure 1B. Internal standards at two different concentrations (high and low) were  
101 spiked into each sample.

|                      | <b>CV(high)</b> | <b>CV(low)</b> |
|----------------------|-----------------|----------------|
| <b>Cryptophytes</b>  | 0.5             | 0.1            |
| <b>Haptophytes</b>   | 2.6             | 4.6            |
| <b>Alveolata</b>     | 2.5             | 4.1            |
| <b>Rhizaria</b>      | 12.3            | 1.8            |
| <b>Stramenopiles</b> | 1.6             | 2.6            |
| <b>Others</b>        | 0.5             | 1.0            |

102

103

104 **Table S2.** A two-component example of the unknown rrn effect on the FCM normalization  
 105 method. Estimates (the bottom row) with more than 100% off the true values are colored in  
 106 red. The rrn for *Oceanospirillaceae* is estimated as the genus averaged rrn from rrnDB. Note  
 107 that this calculation does not account for multiple genome per cell which can also affect the  
 108 FCM normalization results.

109

|                                                     |                           | Sample<br>S1 | Sample<br>S2 | Ratio<br>S1/S2 |
|-----------------------------------------------------|---------------------------|--------------|--------------|----------------|
| <b>True Cell number</b>                             | <b>SAR11</b>              | 1            | 10           | 0.1            |
|                                                     | <i>Oceanospirillaceae</i> | 10           | 1            | 10             |
| <b>FCM counts</b>                                   |                           | 11           | 11           |                |
| <b>16S rRNA gene per cell</b>                       | <b>SAR11</b>              | 1            | 1            |                |
|                                                     | <i>Oceanospirillaceae</i> | 5.4          | 5.4          |                |
| <b>16S rRNA gene counts</b>                         | <b>SAR11</b>              | 1            | 10           |                |
|                                                     | <i>Oceanospirillaceae</i> | 54           | 5.4          |                |
| <b>16S rRNA gene percentage</b>                     | <b>SAR11</b>              | 2%           | 65%          |                |
|                                                     | <i>Oceanospirillaceae</i> | 98%          | 35%          |                |
| <b>Calculated cell number<br/>(FCM × 16S rRNA%)</b> | <b>SAR11</b>              | <b>0.2</b>   | 7.1          | <b>0.028</b>   |
|                                                     | <i>Oceanospirillaceae</i> | 10.8         | <b>3.9</b>   | <b>2.8</b>     |

110

111



112 **Table S3.** Chloroplast 16S and genomic 18S rRNA gene linear correlations (type-II least-  
 113 square fit): correlation coefficient  $R^2$ , slope with standard deviation (SD) and y-intercept with  
 114 SD for Cryptophytes, *Fragilariopsis* (diatom), *Corethron* (diatom), *Proboscia* (diatom), and  
 115 *Phaeocystis*.

116

|                      | <b>Cryptophytes</b> | <b><i>Fragilariopsis</i></b> | <b><i>Corethron</i></b> | <b><i>Proboscia</i></b> | <b><i>Phaeocystis</i></b> |
|----------------------|---------------------|------------------------------|-------------------------|-------------------------|---------------------------|
| <b>R<sup>2</sup></b> | 0.87                | 0.55                         | 0.72                    | 0.40                    | 0.064                     |
| <b>Slope</b>         | 1.1                 | 0.67                         | 1.3                     | 1.3                     | 0.36                      |
| <b>SD</b>            | 0.058               | 0.072                        | 0.11                    | 0.17                    | 0.066                     |
| <b>y-intercept</b>   | $9.10 \times 10^4$  | $-3.02 \times 10^4$          | $4.23 \times 10^4$      | -7.70                   | $5.77 \times 10^4$        |
| <b>SD</b>            | $1.36 \times 10^5$  | $3.03 \times 10^4$           | $2.07 \times 10^4$      | $6.12 \times 10^2$      | $5.60 \times 10^4$        |

117

118

119 The chloroplast 16S rRNA counts and the genomic 18S rRNA counts are within the same  
 120 order of magnitude. Phytoplankton could have much less chloroplasts per cell than genomic  
 121 18S rRNA gene copies per cell. For example, pennate diatoms generally have 1 or 2 large  
 122 chloroplasts per cell (19) and hundreds of 18S rRNA copies per cell (20). Each chloroplast  
 123 contains multiple chloroplast DNA (cpDNA) and some phytoplankton could have up to 650  
 124 copies of cpDNA per chloroplast (21). Assuming a cpDNA number around  $10^2$  (which is  
 125 typical in higher plants and as reported in a phytoplankton study (21)), we would expect  
 126 chloroplast 16S and genomic 18S rRNA gene copies per cell in the same order of magnitude.

127

128 **References**

- 129 1. Kozłowski WA, Deutschman D, Garibotti I, Trees C, Vernet M. 2011. An evaluation of  
130 the application of CHEMTAX to Antarctic coastal pigment data. *Deep Sea Res Part I*  
131 *Oceanogr Res Pap* 58:350–364.
- 132 2. Mackey MD, Mackey DJ, Higgins HW, Wright SW. 1996. CHEMTAX—a program for  
133 estimating class abundances from chemical markers: application to HPLC  
134 measurements of phytoplankton. *Mar Ecol Prog Ser* 265–283.
- 135 3. Smith DC, Azam F. 1992. A simple, economical method for measuring bacterial protein  
136 synthesis rates in seawater using <sup>3</sup>H-leucine. *Mar Microb Food Webs* 6:107–114.
- 137 4. Luria CM, Amaral-Zettler LA, Ducklow HW, Rich JJ. 2016. Seasonal Succession of  
138 Free-Living Bacterial Communities in Coastal Waters of the Western Antarctic  
139 Peninsula . *Front Microbiol* .
- 140 5. Bowman JS, Amaral-Zettler LA, J Rich J, M Luria C, Ducklow HW. 2017. Bacterial  
141 community segmentation facilitates the prediction of ecosystem function along the  
142 coast of the western Antarctic Peninsula. *Isme J* 11:1460.
- 143 6. Parada AE, Needham DM, Fuhrman JA. 2016. Every base matters: assessing small  
144 subunit rRNA primers for marine microbiomes with mock communities, time series  
145 and global field samples. *Environ Microbiol* 18:1403–1414.
- 146 7. Walters WA, Caporaso JG, Lauber CL, Berg-Lyons D, Fierer N, Knight R. 2011.  
147 PrimerProspector: de novo design and taxonomic analysis of barcoded polymerase  
148 chain reaction primers. *Bioinformatics* 27:1159–1161.
- 149 8. Apprill A, McNally S, Parsons R, Weber L. 2015. Minor revision to V4 region SSU

- 150 rRNA 806R gene primer greatly increases detection of SAR11 bacterioplankton.
- 151 9. Caporaso JG, Lauber CL, Walters WA, Berg-Lyons D, Lozupone CA, Turnbaugh PJ,  
152 Fierer N, Knight R. 2011. Global patterns of 16S rRNA diversity at a depth of millions  
153 of sequences per sample. *Proc Natl Acad Sci* 108:4516–4522.
- 154 10. Quast C, Pruesse E, Yilmaz P, Gerken J, Schweer T, Yarza P, Peplies J, Glöckner FO.  
155 2012. The SILVA ribosomal RNA gene database project: improved data processing and  
156 web-based tools. *Nucleic Acids Res* 41:D590–D596.
- 157 11. Stoeck T, Bass D, Nebel M, Christen R, Jones MDM, BREINER H, Richards TA.  
158 2010. Multiple marker parallel tag environmental DNA sequencing reveals a highly  
159 complex eukaryotic community in marine anoxic water. *Mol Ecol* 19:21–31.
- 160 12. Lin Y, Cassar N, Marchetti A, Moreno C, Ducklow H, Li Z. 2017. Specific eukaryotic  
161 plankton are good predictors of net community production in the Western Antarctic  
162 Peninsula. *Sci Rep* 1.
- 163 13. Bystrykh L V. 2012. Generalized DNA barcode design based on Hamming codes. *PLoS*  
164 *One* 7:e36852.
- 165 14. Rognes T, Flouri T, Nichols B, Quince C, Mahé F. 2016. VSEARCH: a versatile open  
166 source tool for metagenomics. *PeerJ* 4:e2584.
- 167 15. Edgar RC, Flyvbjerg H. 2015. Error filtering, pair assembly and error correction for  
168 next-generation sequencing reads. *Bioinformatics* 31:3476–3482.
- 169 16. Edgar RC. 2010. Search and clustering orders of magnitude faster than BLAST.  
170 *Bioinformatics* 26:2460–2461.
- 171 17. Caporaso JG, Kuczynski J, Stombaugh J, Bittinger K, Bushman FD, Costello EK,

- 172 Fierer N, Pena AG, Goodrich JK, Gordon JI. 2010. QIIME allows analysis of high-  
173 throughput community sequencing data. *Nat Methods* 7:335–336.
- 174 18. Camacho C, Coulouris G, Avagyan V, Ma N, Papadopoulos J, Bealer K, Madden TL.  
175 2009. BLAST+: architecture and applications. *BMC Bioinformatics* 10:421.
- 176 19. Round FE, Crawford RM, Mann DG. 1990. *Diatoms: biology and morphology of the*  
177 *genera*. Cambridge university press.
- 178 20. Godhe A, Asplund ME, Härnström K, Saravanan V, Tyagi A, Karunasagar I. 2008.  
179 Quantification of diatom and dinoflagellate biomasses in coastal marine seawater  
180 samples by real-time PCR. *Appl Environ Microbiol* 74:7174–7182.
- 181 21. Ersland DR, Aldrich J, Cattolico RA. 1981. Kinetic complexity, homogeneity, and copy  
182 number of chloroplast DNA from the marine alga *Olisthodiscus luteus*. *Plant Physiol*  
183 68:1468–1473.
- 184
- 185
